# Supplementary material for: ADAM17-dependent proteolysis of L-selectin promotes early clonal expansion of cytotoxic T cells
Source: Springer Nature journal article supplement (doi:10.1038/s41598-019-41811-z), 2019-04-02
Supplement: MOESM1 [file 41598_2019_41811_MOESM1_ESM.pdf]

## **ADAM17-dependent proteolysis of L-selectin promotes early clonal expansion of cytotoxic T cells**

Rebar N Mohammed<sup>1,2\*</sup>, Sophie C Wehenkel<sup>1\*</sup>, Elena V Galkina<sup>3,4</sup>, Emma-Kate Yates<sup>3</sup>, Graham Preece<sup>3</sup>, Andrew Newman<sup>1</sup>, H Angharad Watson<sup>1</sup>, Julia Ohme<sup>1</sup>, John S Bridgeman<sup>1</sup>, Ruban R P Durairaj<sup>1</sup>, Owen R Moon<sup>1</sup>, Kristin Ladell<sup>1</sup>, Kelly L Miners<sup>1</sup>, Garry Dolton<sup>1</sup>, Linda Troeberg<sup>5</sup>, Masahide Kashiwagi<sup>6</sup>, Gillian Murphy<sup>7</sup>, Hideaki Nagase<sup>8</sup>, David A Price<sup>1,9</sup>, R James Matthews<sup>1</sup>, Vera Knäuper<sup>10</sup> and Ann Ager<sup>1,9</sup>

\* These authors contributed equally to the manuscript.

*This paper is dedicated to Graham Preece who died on 11<sup>th</sup> November 2018.*

<sup>1</sup>Division of Infection and Immunity, School of Medicine, Cardiff University, Cardiff CF14 4XN, UK.

<sup>2</sup>College of Veterinary Medicine, University of Sulaimani, Sulaimani, Kurdistan/Iraq.

<sup>3</sup>Francis Crick Institute, London, NW1 1AT, UK.

<sup>4</sup>Department of Microbiology and Molecular Cell Biology, Eastern Virginia Medical School, Norfolk, VA 23507, USA.

<sup>5</sup>Norwich Medical School, University of East Anglia, Norwich, NR4 7UQ, UK.

<sup>6</sup>Takeda Pharmaceutical Research Institute, Tsukuba, Japan.

<sup>7</sup>University of Cambridge Department of Oncology, Cancer Research UK Cambridge Institute, Li Ka Shing Centre, Cambridge, CB2 0RE, UK.

<sup>8</sup>Kennedy Institute of Rheumatology, University of Oxford, Oxford OX3 7FY, UK.

<sup>9</sup>Systems Immunity Research Institute, Cardiff University, Heath Park, Cardiff CF14 4XN, UK.

<sup>10</sup>School of Dentistry, Cardiff University, Heath Park, Cardiff CF14 4XN, UK.

**Corresponding author:** [agera@cardiff.ac.uk](mailto:agera@cardiff.ac.uk).

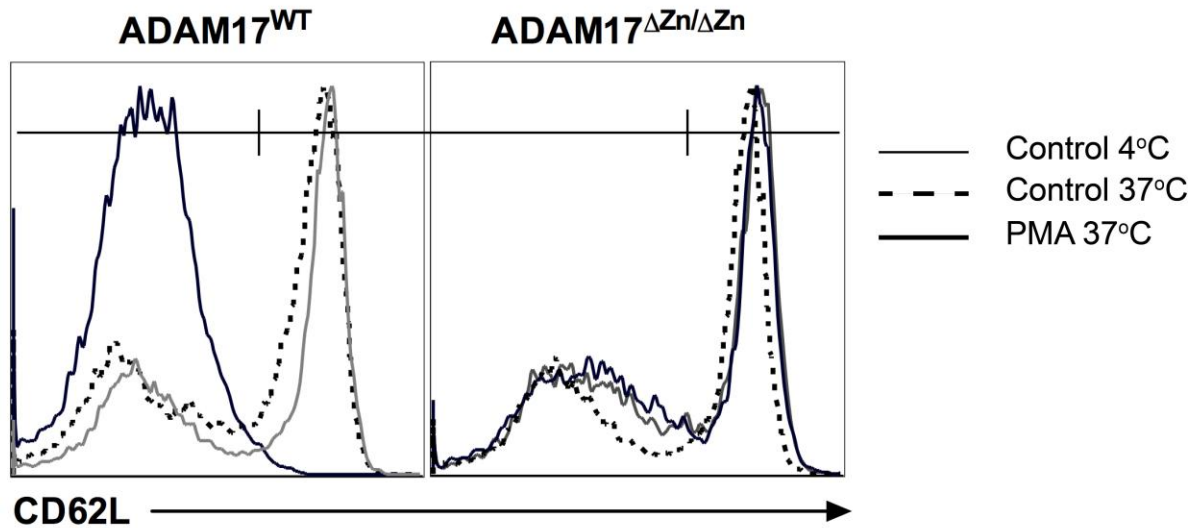

**Supplementary Figure 1, related to Figure 1. Effect of ADAM17 on L-selectin expression by T-cells under homeostatic and activating conditions.**

ADAM17-sufficient (ADAM17<sup>WT</sup>) and ADAM17-deficient (ADAM17<sup>ΔZn/ΔZn</sup>) T-cells harvested from peripheral lymph nodes of RAG-1-deficient haematopoietic stem cell chimeric mice were incubated at 4 °C or 37 °C in the absence or presence of 300nM PMA. Cell surface expression of L-selectin (CD62L) was analyzed by flow cytometry. Representative histograms show overlays of treatments and gating of L-selectin (CD62L) positive T-cells.

| Mouse ID                      | ADAM 17    | Background                           | F5 TCR     | Wildtype L-selectin | LΔP transgene | Thy    |
|-------------------------------|------------|--------------------------------------|------------|---------------------|---------------|--------|
| ADAM17 <sup>WT</sup>          | +/+ or +/- | B6 RAG-1 <sup>-/-</sup> chimera      | none       | +/+                 | none          | Thy1.2 |
| ADAM17 <sup>ΔZn/ΔZn</sup>     | -/-        | B6 RAG-1 <sup>-/-</sup> chimera      | none       | +/+                 | none          | Thy1.2 |
| ADAM17 <sup>WT</sup>          | +/+ or +/- | B6 L-selectin <sup>-/-</sup> chimera | none       | +/+                 | none          | Thy1.2 |
| ADAM17 <sup>ΔZn/ΔZn</sup>     | -/-        | B6 L-selectin <sup>-/-</sup> chimera | none       | +/+                 | none          | Thy1.2 |
| DBA                           | +/+        | DBA                                  | none       | +/+                 | none          | Thy1.2 |
| ADAM17 <sup>ΔZn/ΔZn</sup> DBA | -/-        | DBA                                  | none       | +/+                 | none          | Thy1.2 |
| F5/B6                         | +/+        | B6                                   | hemizygous | +/+                 | none          | Thy1.2 |
| F5/LΔP                        | +/+        | B6                                   | hemizygous | -/-                 | hemizygous    | Thy1.2 |
| LΔP                           | +/+        | B6                                   | none       | -/-                 | hemizygous    | Thy1.2 |
| C57BL/6 (B6)                  | +/+        | B6                                   | none       | +/+                 | none          | Thy1.2 |
| Thy1.1                        | +/+        | B6                                   | none       | +/+                 | none          | Thy1.1 |

**Supplementary Table 1. Genotype of mouse strains used.**

| Cell line ID    | Species | Cell type                     | TCR | Wildtype L-selectin | L-selectin transgene                |
|-----------------|---------|-------------------------------|-----|---------------------|-------------------------------------|
| L-selectin      | Human   | Molt3                         | 868 | -/-                 | Wildtype human L-selectin           |
| $\Delta$ M-N    | Human   | Molt3                         | 868 | -/-                 | Shedding-resistant human L-selectin |
| F5/B6           | Mouse   | CD8 <sup>+</sup> naïve or CTL | F5  | +/+                 | none                                |
| F5/L $\Delta$ P | Mouse   | CD8 <sup>+</sup> naïve or CTL | F5  | -/-                 | Shedding-resistant mouse L-selectin |

**Supplementary Table 2. Genotype of T cells used.**
